# Supplementary material for: Vitamin D Inhibition of TRPV5 Expression During Osteoclast Differentiation
Source: PubMed Central journal article supplement — Int J Endocrinol Metab. 2019 Oct 14;17(4):e91583. doi: 10.5812/ijem.91583 (PMC6948119; doi:10.5812/ijem.91583), 2019-10-14
Supplement: ijem-17-4-91583-s001.pdf [file ijem-17-4-91583-s001.pdf]

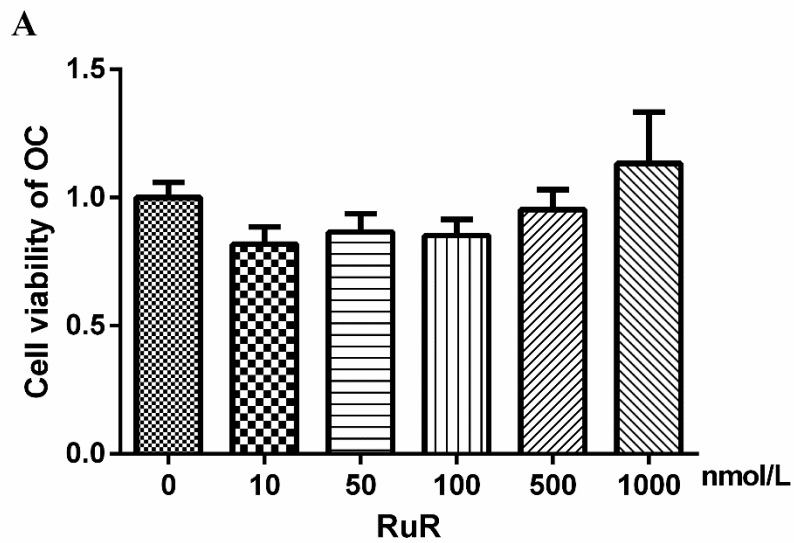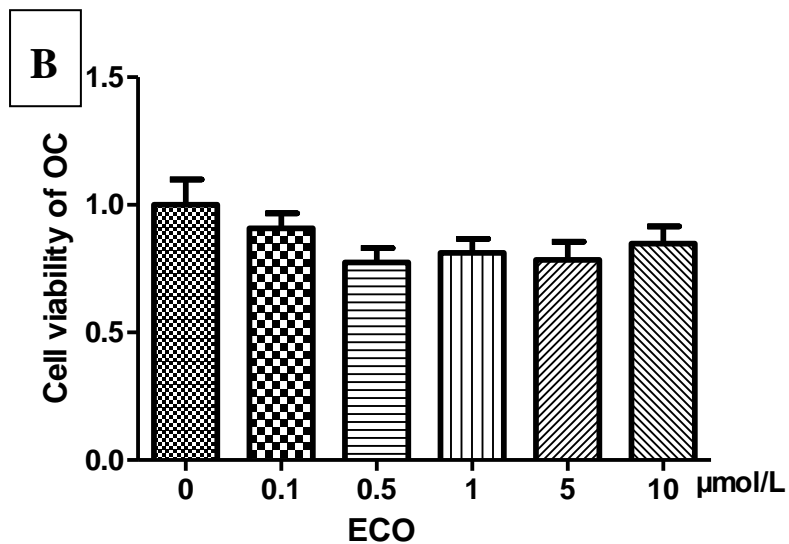

**Appendix1. The effects of osteoclast by RuR and ECO treatment in RANKL and M-CSF induced.** (A and B). The cells viability were detected by different concentration of RuR and ECO treatment in RANKL and M-CSF treatment. Data means average  $\pm$  s.d. (n=9 each).
